# Supplementary material for: How adverse childhood experiences get under the skin: A systematic review, integration and methodological discussion on threat and reward learning mechanisms
Source: eLife. 2024 Jul 16;13:e92700. doi: 10.7554/eLife.92700 (PMC11251725; doi:10.7554/eLife.92700)
Supplement: Supplementary file 8. [file elife-92700-supp8.xlsx]

## Sheet: Tabelle2
Supplementary file 8
Quality assessment of the threat learning studies
Authors	1) Sample size	2) Representative Sample	3) Drop-out	4) Psycho- pathology	5) ACE types	6) ACE measures	7) Two groups, continuous	Sum
Machlin (2019) same sample as Milojevich (2020)	0.5	1	1	0	1	0	1	4.5
Milojevich (2020) same sample as Machlin (2019)	0.5	1	1	0	1	0	1	4.5
Marusak (2021)	0	1	1	1	1	1	1	6
Jovanovic (2022)	0.5	0.5	1	1	1	1	1	6
Qiu (2022)	0.5	0.5	0	0	0	0	1	2
France (2022)	0	0	1	0	1	1	1	4
Silvers (2016)	0.5	0	0	0	0	0	1	1.5
DeCross (2022)	1	1	1	1	0	1	1	6
McLaughlin (2016) same sample as Jenness (2018)	0.5	1	1	1	0	0	1	4.5
Jenness (2018) same sample as McLaughlin (2016)	0.5	1	1	1	0	0	1	4.5
Susman (2021)	1	1	1	1	0	1	1	6
WolitzkyTaylor (2022)	1	0.5	0	1	1	1	1	5.5
Kreutzer (2021)	1	1	1	1	1	1	1	7
Lange (2018)	1	1	0	1	1	0	0	4
Zoladz(2022)	1	0	0	1	1	1	0	4
Pole (2007)	0	0.5	1	1	1	0	1	4.5
Scharfenort (2016)	0.5	0.5	1	1	1	0	1	5
Lis (2020) overlapping sample with Thome (2018)	0.5	1	1	1	0	1	1	5.5
Thome (2018) overlapping sample with Lis (2020)	0.5	1	1	1	0	1	1	5.5
Jovanovic (2009)	0	0.5	0	1	0	1	1	3.5
Stout (2021)	1	0.5	0	1	1	1	1	5.5
Huskey (2022)	0	0	1	0	1	1	1	4
Bremner (2005)	0	0	0	1	1	1	1	4
Kuehl (2020)	1	0.5	1	1	0	0	1	4.5
Morrison (2022)	0.5	0.5	0	1	0	0	1	3
Klingelhöfer-Jens (2023)	1	0.5	1	1	1	1	1	6.5
Jovanovic (2020)	0	0	1	1	1	1	0	4
Stenson (2021)	0.5	0.5	1	1	1	1	0	5
Radoman (2019)	0.5	0.5	1	1	0	1	1	5
Rowland (2022)	1	1	1	1	0	0	1	5
Estrada (2020)	1	1	0	1	1	1	1	6
Morey (2015)	0.5	0.5	0	1	1	1	1	5
Schellhaas (2022)	1	1	1	1	1	1	1	7
Young (2018) overlapping sample with Young 2019	1	0.5	0	1	0	1	1	4.5
Young (2019) overlapping sample with Young 2018	0.5	0.5	0	1	0	1	1	4
Hall (2022)	0.5	0.5	1	1	1	1	1	6
Deslauriers (2018)	1	0.5	1	0	1	1	1	5.5
Harnett (2019)	1	0.5	1	0	1	0	1	4.5
