# Supplementary material for: How adverse childhood experiences get under the skin: A systematic review, integration and methodological discussion on threat and reward learning mechanisms
Source: eLife. 2024 Jul 16;13:e92700. doi: 10.7554/eLife.92700 (PMC11251725; doi:10.7554/eLife.92700)
Supplement: Supplementary file 9. [file elife-92700-supp9.xlsx]

## Sheet: Tabelle2
Supplementary file 9
Quality assessment of the reward learning studies
Authors	1) Sample size	2) Representative Sample	3) Drop-out	4) Psycho-pathology	5) ACE types	6) ACE measures	7) two groups, continuous	Sum
1.Birn (2017)	0	0	1	1	1	1	1	5
2. Blair (2022)	1	1	1	1	1	1	1	7
3. Boecker-Schlier (2016)	1	1	1	1	1	1	1	7
4. Cisler (2019)	0	0.5	1	1	1	1	1	5.5
5. DelDonno (2019)	0	1	1	1	1	1	1	6
6. Dennison (2016)	0	1	1	1	1	1	1	6
7.Dennison (2019)	0.5	1	1	1	1	1	1	6.5
8. Dillon (2009)	0	0.5	1	1	1	1	1	5.5
9. Eckstrand (2019)	1	1	1	1	1	1	1	7
10. Gerin (2017)	0	1	1	1	1	1	1	6
11. Hanson (2017)	0.5	1	0	0	1	1	1	4.5
12. Harms (2017)	0	1	1	0	1	1	1	5
13. Hendrikse (2022)	1	0.5	1	1	1	1	1	6.5
14. Kennedy (2021)	0.5	1	0	0	1	1	1	4.5
15. Letkiewicz (2022)	0	0.5	1	1	1	1	1	5.5
16. Lloyd (2022)	0.5	1	1	0	1	1	1	5.5
17. McCutcheon (2019)	0	0.5	0	1	1	0	1	3.5
18. Mehta (2010)	0	0.5	1	0	0	0	1	2.5
19. Morelli (2021)	1	1	1	1	1	0	1	6
20. Mueller (2012)	0	1	1	1	0	0	1	4
21. Patternson (2013) Exp 1	1	0.5	1	1	1	1	1	6.5
22. Patternson (2013) Exp 2	1	0.5	1	1	1	1	1	6.5
23. Pechtel (2013)	0	0.5	1	1	0	0	1	3.5
24.Sheridan (2018)	1	0.5	1	0	0	0	1	3.5
25. Smith (2022)	0.5	1	1	1	0	0	1	4.5
26. Weiss (2019)	0	0.5	1	0	1	0	1	3.5
27. Wilkinson (2021)	1	1	0	1	1	1	1	6
28. Wismer-Fries (2017)	0	0.5	1	1	0	0	1	3.5
29. Yang (2021)	0.5	0.5	1	1	1	1	1	6
30. Kwarteng (2021)	1	1	1	0	0	1	1	5
31. Weiland (2014)	0	0.5	1	1	0	1	1	4.5
32. Martz (2022) sample 1	1	1	0	0	0	1	1	4
33. Martz (2022) sample 2	1	0.5	1	1	0	1	1	5.5
34. Bjork (2008)	0	1	0	1	0	1	1	4
35. Müller (2014) sample 1	1	1	1	1	0	1	1	6
35. Müller (2014) sample 2	1	1	1	1	0	1	1	6
36. Yau (2012)	0	0.5	1	1	0	1	1	4.5
37. Morris (2015)	1	0.5	1	1	0	0	1	4.5
38. Casement (2014)	1	0.5	1	1	0	1	1	5.5
39. Gonzalez (2016)	1	0.5	1	1	0	0	1	4.5
40. Mullins (2020)	1	1	1	1	0	0	1	5
41. Delgado (2022)	1	1	0	0	0	0	0	2
42. Romens (2016)	1	0	1	1	0	0	1	4
43. White (2022)	1	1	0	1	0	0	2	5
